# Supplementary material
Source: PubMed Central journal article supplement (PMC3461816)
Supplement: cbt-13-1102-s01.pdf [file cbt-13-1102-s01.pdf]

## **Supplemental Material to:**

**Jayashree Karar, George J. Cerniglia, Tullia Lindsten,  
Constantinos Koumenis and Amit Maity**

**Dual PI3K/mTOR inhibitor NVP-BEZ235 suppresses  
hypoxia-inducible factor (HIF)-1 $\alpha$  expression by blocking  
protein translation and increases cell death under hypoxia**

**Cancer Biology & Therapy 2012; 13(11)**

**<http://dx.doi.org/10.4161/cbt.21144>**

**<http://www.landesbioscience.com/journals/cbt/article/21144/>**

## Supplementary Fig. S1

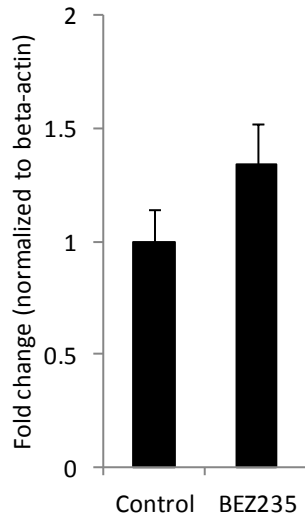

SQ20B cells were treated with BEZ235 for 24 hours under hypoxia prior to RNA isolation. The graph represents fold change values of HIF-1 $\alpha$  mRNA obtained by real time RT-PCR.

## Supplementary Fig. S2

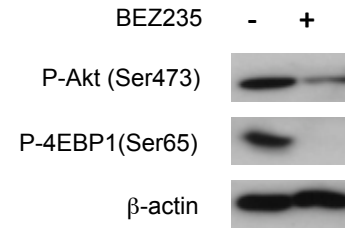

SQ20B cells were treated with BEZ235 for 24 hours prior to protein harvesting.

## Supplementary Fig. S3

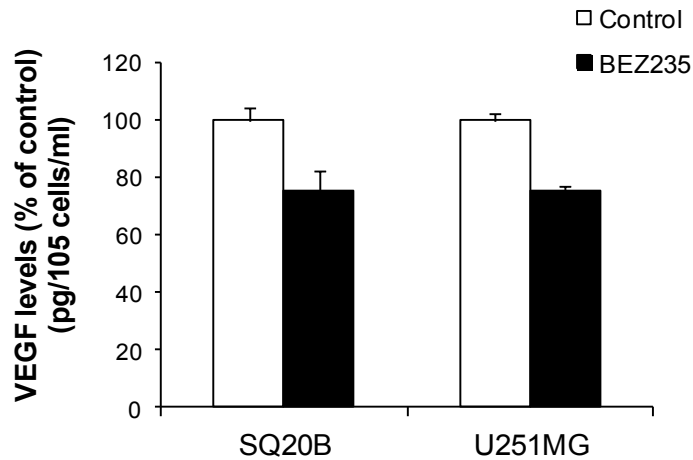

SQ20B and U251MG cells were treated with BEZ235 for 24 hours. VEGF ELISA (R&D Systems) was performed from media collected from the treated cells.

## Supplementary Fig. S4

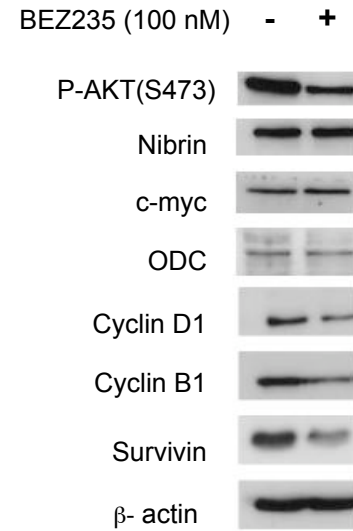

U251MG cells were treated with BEZ235 for 24 hours prior to protein harvesting.
